# Supplementary material for: Path Coefficient and Principal Component Analyses for Biomass Allocation, Drought Tolerance and Carbon Sequestration Potential in Wheat
Source: MDPI journal article supplement (doi:10.3390/plants11111407), 2022-05-26
Supplement: s1 [file s1]

# Supplementary Tables

**Table S1** Mean values of yield components and root attributes of the ten parental lines and 90 F<sub>2</sub> families of wheat based on grain yield under drought-stressed conditions.

| No. | Genotype      | DTH   |       | DTM    |        | PH    |       | TN    |       | SL    |       | SPS   |       | KPS   |       | TKW   |       |
|-----|---------------|-------|-------|--------|--------|-------|-------|-------|-------|-------|-------|-------|-------|-------|-------|-------|-------|
|     |               | NS    | DS    | NS     | DS     | NS    | DS    | NS    | DS    | NS    | DS    | NS    | DS    | NS    | DS    | NS    | DS    |
| 1   | LM75          | 60.75 | 61.25 | 102.00 | 97.75  | 92.58 | 89.03 | 9.56  | 12.56 | 8.64  | 9.08  | 17.50 | 17.50 | 35.54 | 39.96 | 40.53 | 30.64 |
| 2   | LM26 x BW140  | 53.75 | 59.75 | 103.75 | 106.00 | 80.88 | 75.20 | 10.78 | 13.31 | 8.80  | 9.10  | 16.63 | 16.00 | 37.33 | 36.00 | 36.90 | 34.20 |
| 3   | BW140 x LM71  | 55.25 | 57.00 | 103.50 | 99.25  | 78.75 | 76.48 | 8.00  | 9.81  | 8.58  | 8.61  | 16.75 | 16.63 | 41.38 | 39.75 | 37.25 | 35.89 |
| 4   | LM47 x BW152  | 59.25 | 59.50 | 107.00 | 100.00 | 83.30 | 92.13 | 10.19 | 10.13 | 9.48  | 9.38  | 16.88 | 17.63 | 35.79 | 40.88 | 39.66 | 30.35 |
| 5   | LM70 x BW152  | 65.25 | 60.50 | 106.25 | 98.25  | 95.45 | 85.00 | 14.25 | 10.31 | 9.95  | 9.75  | 19.13 | 18.13 | 42.63 | 32.25 | 39.97 | 34.45 |
| 6   | LM70 x BW141  | 56.50 | 54.50 | 106.50 | 95.00  | 90.45 | 83.73 | 7.63  | 10.38 | 9.85  | 8.67  | 18.38 | 17.25 | 45.21 | 40.21 | 42.48 | 36.82 |
| 7   | BW162 x LM75  | 60.50 | 63.00 | 102.50 | 96.75  | 94.85 | 92.03 | 10.88 | 9.44  | 9.48  | 9.18  | 17.63 | 18.00 | 39.67 | 38.25 | 41.83 | 31.88 |
| 8   | LM75 x BW141  | 59.00 | 54.50 | 104.25 | 98.25  | 86.23 | 79.55 | 11.88 | 12.31 | 9.56  | 8.58  | 19.38 | 17.38 | 41.96 | 34.29 | 42.45 | 35.37 |
| 9   | BW152 x BW141 | 62.25 | 59.75 | 105.50 | 94.25  | 86.55 | 84.90 | 6.83  | 9.38  | 9.55  | 8.99  | 17.88 | 16.63 | 41.83 | 32.83 | 43.83 | 32.26 |
| 10  | LM70 x BW162  | 62.50 | 60.25 | 103.50 | 96.00  | 84.58 | 78.58 | 9.94  | 12.13 | 8.93  | 9.45  | 16.88 | 18.00 | 36.33 | 33.88 | 43.85 | 33.33 |
| 11  | BW141 x LM26  | 55.25 | 56.75 | 108.25 | 104.25 | 89.43 | 75.93 | 11.92 | 8.31  | 10.18 | 8.25  | 18.50 | 16.00 | 36.54 | 37.71 | 43.92 | 35.99 |
| 12  | LM48 x BW140  | 57.50 | 58.00 | 111.50 | 103.25 | 85.58 | 72.13 | 12.94 | 6.81  | 10.13 | 7.43  | 21.63 | 14.63 | 48.42 | 33.88 | 37.21 | 32.84 |
| 13  | LM75 x LM47   | 60.25 | 59.75 | 105.75 | 94.75  | 95.75 | 91.15 | 7.13  | 13.06 | 9.80  | 10.00 | 18.25 | 17.50 | 37.25 | 36.00 | 44.99 | 33.77 |
| 14  | LM70 x LM26   | 55.75 | 58.33 | 106.00 | 105.00 | 85.60 | 83.67 | 7.38  | 9.33  | 9.59  | 9.88  | 17.25 | 18.50 | 34.96 | 40.17 | 39.51 | 39.38 |
| 15  | LM47 x BW140  | 61.50 | 58.25 | 108.25 | 99.75  | 86.55 | 79.30 | 11.38 | 11.25 | 9.05  | 8.75  | 17.75 | 16.50 | 34.08 | 34.67 | 41.43 | 34.35 |
| 16  | LM26 x LM71   | 60.75 | 57.00 | 107.75 | 100.00 | 93.13 | 87.20 | 9.88  | 10.75 | 9.39  | 9.43  | 17.75 | 18.00 | 36.75 | 34.83 | 36.35 | 29.67 |
| 17  | BW141 x LM75  | 59.25 | 55.25 | 106.75 | 100.50 | 95.43 | 87.18 | 11.56 | 10.50 | 8.55  | 9.00  | 18.13 | 17.13 | 43.54 | 31.79 | 41.58 | 37.10 |
| 18  | BW162 x LM26  | 59.25 | 55.50 | 108.00 | 95.25  | 83.45 | 84.83 | 9.31  | 12.44 | 9.08  | 9.19  | 18.63 | 19.00 | 42.38 | 34.25 | 38.49 | 31.47 |
| 19  | LM26 x BW141  | 54.50 | 56.00 | 105.75 | 99.50  | 90.40 | 71.65 | 11.31 | 6.44  | 8.58  | 8.63  | 17.75 | 16.88 | 41.75 | 38.79 | 40.67 | 31.24 |
| 20  | LM71 x LM26   | 55.75 | 56.00 | 110.25 | 98.00  | 88.70 | 78.38 | 13.63 | 7.63  | 10.50 | 8.83  | 20.25 | 17.50 | 35.21 | 31.21 | 40.26 | 29.62 |
| 21  | BW152 x LM75  | 59.75 | 58.25 | 107.25 | 99.00  | 89.28 | 83.60 | 12.41 | 11.63 | 9.70  | 9.00  | 19.00 | 18.75 | 40.67 | 35.46 | 43.69 | 35.41 |
| 22  | LM48 x BW162  | 69.50 | 61.67 | 112.00 | 101.33 | 98.80 | 84.33 | 6.50  | 7.67  | 9.57  | 8.16  | 19.00 | 16.38 | 38.67 | 36.50 | 45.00 | 37.29 |
| 23  | LM75 x BW152  | 60.75 | 63.00 | 105.00 | 96.50  | 93.33 | 82.68 | 12.56 | 10.75 | 9.40  | 9.45  | 18.75 | 17.38 | 41.92 | 37.75 | 42.25 | 37.63 |
| 24  | BW152 x LM26  | 56.25 | 57.50 | 106.75 | 99.75  | 81.58 | 75.48 | 9.31  | 7.75  | 8.38  | 7.15  | 17.75 | 15.00 | 30.33 | 30.17 | 36.58 | 36.86 |
| 25  | BW140 x LM75  | 55.75 | 56.25 | 105.25 | 100.75 | 85.55 | 71.70 | 13.94 | 9.94  | 8.00  | 7.60  | 15.75 | 14.38 | 31.63 | 28.96 | 45.75 | 40.19 |
| 26  | BW140 x BW152 | 58.75 | 57.50 | 109.50 | 98.75  | 85.00 | 80.60 | 11.81 | 13.94 | 8.50  | 7.88  | 18.25 | 16.63 | 36.42 | 28.29 | 43.45 | 34.48 |
| 27  | BW162 x BW140 | 55.25 | 56.00 | 103.00 | 102.50 | 75.90 | 73.18 | 9.31  | 12.50 | 6.70  | 7.83  | 12.88 | 14.88 | 33.92 | 30.17 | 37.81 | 34.71 |
| 28  | LM75 x BW140  | 56.50 | 56.75 | 112.00 | 100.50 | 86.10 | 78.30 | 9.13  | 9.31  | 8.98  | 6.33  | 19.38 | 13.38 | 38.92 | 25.92 | 40.09 | 36.42 |
| 29  | LM71 x BW140  | 57.25 | 55.50 | 109.25 | 98.25  | 75.78 | 75.58 | 8.75  | 8.81  | 7.38  | 9.56  | 14.25 | 17.63 | 38.08 | 34.46 | 36.08 | 31.32 |
| 30  | BW141 x LM70  | 58.75 | 60.75 | 103.75 | 96.25  | 96.38 | 91.18 | 12.38 | 11.31 | 9.46  | 9.24  | 17.13 | 17.75 | 38.83 | 34.63 | 46.73 | 35.31 |

DTH = days to 50% heading, DTM = days to 50% maturity, PH = plant height (cm), TN = tiller number, SL = spike length (cm), SPS = spikelets per spike, KPS = kernels per spike, TKW = thousand kernel weight (g), NS = non-stressed, DS = drought-stressed

Table S1 continued.

| No. | Genotype      | DTH   |       | DTM    |        | PH    |       | TN    |       | SL    |       | SPS   |       | KPS   |       | TKW   |       |
|-----|---------------|-------|-------|--------|--------|-------|-------|-------|-------|-------|-------|-------|-------|-------|-------|-------|-------|
|     |               | NS    | DS    | NS     | DS     | NS    | DS    | NS    | DS    | NS    | DS    | NS    | DS    | NS    | DS    | NS    | DS    |
| 31  | LM75 x LM48   | 62.25 | 61.50 | 103.75 | 98.00  | 83.30 | 86.33 | 8.94  | 12.19 | 8.27  | 9.13  | 15.50 | 17.25 | 36.08 | 35.96 | 40.15 | 29.25 |
| 32  | BW141 x BW152 | 61.50 | 59.75 | 111.00 | 100.25 | 99.40 | 82.03 | 12.50 | 7.19  | 9.57  | 8.00  | 18.67 | 16.50 | 38.63 | 33.43 | 39.06 | 31.39 |
| 33  | LM75 x LM70   | 62.75 | 58.25 | 106.25 | 96.25  | 91.50 | 88.45 | 9.06  | 7.13  | 9.38  | 8.95  | 17.50 | 16.38 | 38.46 | 34.79 | 40.84 | 39.54 |
| 34  | LM70 x LM47   | 59.25 | 64.25 | 101.50 | 98.75  | 96.28 | 92.75 | 11.94 | 10.06 | 9.63  | 9.50  | 17.88 | 16.75 | 43.67 | 34.25 | 48.34 | 34.76 |
| 35  | LM26 x LM48   | 57.00 | 57.25 | 104.50 | 98.00  | 85.08 | 79.63 | 11.06 | 7.00  | 8.68  | 9.00  | 15.88 | 17.63 | 44.08 | 45.58 | 36.73 | 31.80 |
| 36  | BW162         | 64.75 | 59.25 | 102.50 | 100.75 | 93.13 | 70.05 | 13.56 | 6.00  | 9.13  | 7.13  | 17.88 | 13.75 | 38.88 | 23.67 | 44.76 | 36.34 |
| 37  | BW140 x LM70  | 55.25 | 55.50 | 105.00 | 102.00 | 79.50 | 80.60 | 8.38  | 8.50  | 8.80  | 8.95  | 16.50 | 17.25 | 39.46 | 33.92 | 42.24 | 39.23 |
| 38  | LM70 x LM75   | 62.50 | 62.00 | 107.00 | 93.00  | 97.43 | 94.90 | 8.75  | 11.69 | 9.60  | 9.90  | 17.88 | 17.75 | 38.08 | 41.33 | 44.46 | 31.01 |
| 39  | LM47 x LM70   | 63.75 | 63.75 | 104.50 | 102.50 | 85.93 | 85.78 | 8.75  | 11.69 | 8.05  | 8.89  | 14.63 | 16.38 | 28.33 | 31.08 | 40.11 | 34.72 |
| 40  | LM47 x LM48   | 62.00 | 56.25 | 101.25 | 94.50  | 89.30 | 88.68 | 11.19 | 7.88  | 9.85  | 8.95  | 17.38 | 17.38 | 43.17 | 35.25 | 35.35 | 27.73 |
| 41  | LM26 x BW162  | 55.25 | 59.50 | 105.25 | 97.50  | 88.08 | 78.15 | 11.56 | 10.00 | 9.00  | 9.45  | 16.63 | 18.00 | 43.75 | 34.17 | 40.40 | 31.43 |
| 42  | LM48 x LM26   | 62.75 | 61.25 | 107.25 | 97.75  | 82.05 | 76.75 | 12.06 | 10.44 | 9.43  | 8.80  | 18.25 | 17.88 | 51.25 | 37.96 | 37.84 | 30.42 |
| 43  | BW162 x LM48  | 60.75 | 59.25 | 101.50 | 94.00  | 85.03 | 80.43 | 9.06  | 8.88  | 10.14 | 8.75  | 18.75 | 15.88 | 47.75 | 35.54 | 34.12 | 31.78 |
| 44  | BW141         | 55.50 | 57.25 | 104.75 | 96.75  | 74.60 | 74.95 | 9.88  | 11.31 | 7.88  | 7.69  | 16.13 | 16.63 | 35.63 | 34.04 | 38.94 | 33.60 |
| 45  | LM75 x BW162  | 63.50 | 57.50 | 106.50 | 95.50  | 89.40 | 81.23 | 12.19 | 13.25 | 9.38  | 8.03  | 18.13 | 15.25 | 34.38 | 30.75 | 44.02 | 34.33 |
| 46  | BW140 x BW162 | 51.33 | 53.75 | 104.67 | 96.75  | 84.70 | 74.30 | 13.43 | 7.75  | 7.77  | 8.28  | 15.83 | 16.13 | 32.89 | 36.08 | 40.60 | 37.15 |
| 47  | LM71 x LM75   | 59.75 | 60.75 | 104.25 | 98.00  | 86.15 | 82.08 | 15.75 | 10.19 | 9.15  | 8.30  | 17.63 | 14.75 | 39.29 | 30.79 | 41.01 | 35.63 |
| 48  | LM70 x BW140  | 58.75 | 58.25 | 107.75 | 97.50  | 86.00 | 81.80 | 8.19  | 6.81  | 9.13  | 8.45  | 17.13 | 15.25 | 33.42 | 26.46 | 43.10 | 40.40 |
| 49  | LM26 x LM75   | 62.50 | 60.50 | 104.25 | 94.25  | 91.40 | 86.95 | 13.81 | 12.13 | 8.83  | 9.13  | 17.00 | 16.63 | 37.42 | 33.54 | 42.29 | 28.99 |
| 50  | BW162 x BW141 | 55.25 | 59.00 | 105.75 | 98.25  | 95.23 | 84.93 | 9.16  | 10.38 | 9.88  | 9.05  | 18.63 | 18.75 | 38.88 | 32.71 | 44.88 | 32.01 |
| 51  | BW140 x LM48  | 58.25 | 58.50 | 107.50 | 98.25  | 76.40 | 73.25 | 6.13  | 9.19  | 6.63  | 7.38  | 13.13 | 15.00 | 28.75 | 34.04 | 37.84 | 37.82 |
| 52  | LM26          | 59.25 | 56.75 | 103.50 | 95.50  | 83.90 | 69.05 | 10.19 | 7.81  | 9.48  | 8.68  | 17.63 | 17.38 | 44.58 | 41.63 | 35.01 | 29.34 |
| 53  | LM48 x BW141  | 60.75 | 59.00 | 111.75 | 102.50 | 88.63 | 70.08 | 10.56 | 9.56  | 9.23  | 7.68  | 17.75 | 14.63 | 36.38 | 34.46 | 38.41 | 32.13 |
| 54  | LM47 x LM26   | 58.25 | 58.75 | 109.25 | 97.75  | 90.48 | 86.30 | 11.75 | 9.31  | 9.33  | 9.15  | 18.25 | 18.00 | 41.11 | 34.63 | 49.50 | 30.85 |
| 55  | BW140 x BW141 | 53.00 | 56.25 | 106.00 | 101.75 | 74.90 | 61.03 | 10.31 | 10.81 | 6.88  | 7.00  | 14.38 | 13.50 | 30.71 | 29.75 | 45.38 | 36.47 |
| 56  | BW152 x LM48  | 66.75 | 61.00 | 107.50 | 97.50  | 91.00 | 81.90 | 9.69  | 9.13  | 8.95  | 8.75  | 19.25 | 17.75 | 50.33 | 38.63 | 33.56 | 29.56 |
| 57  | BW140         | 63.67 | 57.00 | 118.00 | 99.00  | 79.20 | 78.55 | 9.81  | 11.44 | 8.93  | 8.64  | 18.25 | 18.75 | 48.92 | 38.13 | 34.96 | 28.95 |
| 58  | LM70 x LM71   | 62.25 | 61.00 | 108.25 | 92.25  | 81.88 | 89.70 | 11.31 | 10.31 | 11.88 | 10.19 | 22.63 | 19.00 | 45.06 | 35.08 | 41.67 | 29.27 |
| 59  | LM26 x LM47   | 59.25 | 56.00 | 107.25 | 97.75  | 93.15 | 85.23 | 12.94 | 7.00  | 10.43 | 8.68  | 18.88 | 16.63 | 42.63 | 31.46 | 42.87 | 36.44 |
| 60  | BW162 x BW152 | 60.00 | 62.50 | 100.25 | 97.75  | 90.60 | 80.48 | 11.00 | 9.81  | 9.56  | 9.50  | 18.13 | 18.13 | 37.92 | 31.04 | 41.82 | 32.61 |

DTH = days to 50% heading, DTM = days to 50% maturity, PH = plant height (cm), TN = tiller number, SL = spike length (cm), SPS = spikelets per spike, KPS = kernels per spike, TKW = thousand kernel weight (g), NS = non-stressed, DS = drought-stressed

Table S1 continued.

| No. | Genotype      | DTH   |       | DTM    |        | PH    |       | TN    |       | SL    |      | SPS   |       | KPS   |       | TKW   |       |
|-----|---------------|-------|-------|--------|--------|-------|-------|-------|-------|-------|------|-------|-------|-------|-------|-------|-------|
|     |               | NS    | DS    | NS     | DS     | NS    | DS    | NS    | DS    | NS    | DS   | NS    | DS    | NS    | DS    | NS    | DS    |
| 61  | LM71 x BW152  | 62.67 | 62.25 | 108.00 | 96.50  | 76.78 | 76.75 | 7.06  | 11.63 | 7.88  | 7.78 | 14.75 | 15.50 | 29.75 | 28.92 | 42.76 | 33.02 |
| 62  | LM48 x LM47   | 64.25 | 60.50 | 104.50 | 96.50  | 96.33 | 75.65 | 11.38 | 12.56 | 10.00 | 8.69 | 18.13 | 15.50 | 36.83 | 28.38 | 40.00 | 36.33 |
| 63  | BW140 x LM26  | 56.75 | 56.00 | 110.75 | 101.75 | 85.83 | 78.45 | 13.00 | 5.36  | 8.48  | 7.81 | 18.00 | 15.63 | 35.54 | 28.88 | 34.79 | 36.18 |
| 64  | LM47 x LM75   | 57.67 | 61.00 | 100.00 | 95.75  | 87.90 | 82.05 | 11.33 | 8.75  | 9.00  | 8.91 | 17.17 | 16.38 | 33.56 | 26.08 | 47.41 | 34.13 |
| 65  | LM26 x LM70   | 56.75 | 57.00 | 105.00 | 98.75  | 92.78 | 82.68 | 9.63  | 9.00  | 10.53 | 9.54 | 19.44 | 17.50 | 35.89 | 34.67 | 39.96 | 32.78 |
| 66  | LM71 x LM70   | 62.00 | 58.25 | 104.00 | 95.75  | 74.63 | 78.40 | 6.75  | 7.69  | 8.30  | 9.00 | 14.00 | 16.13 | 28.54 | 25.83 | 46.39 | 36.87 |
| 67  | LM48 x LM75   | 60.75 | 61.00 | 102.50 | 96.75  | 89.35 | 69.80 | 9.44  | 6.38  | 9.50  | 7.70 | 19.00 | 14.38 | 46.50 | 32.88 | 36.79 | 33.69 |
| 68  | LM48 x LM70   | 61.50 | 63.25 | 104.00 | 96.25  | 88.75 | 85.33 | 7.75  | 10.38 | 9.73  | 9.00 | 17.50 | 17.38 | 39.50 | 37.21 | 43.72 | 30.69 |
| 69  | LM48 x BW152  | 62.25 | 60.75 | 102.75 | 96.50  | 83.80 | 87.43 | 10.50 | 7.55  | 9.18  | 8.70 | 15.75 | 15.75 | 39.88 | 29.21 | 38.67 | 32.42 |
| 70  | BW140 x LM47  | 61.00 | 60.25 | 108.75 | 97.25  | 91.88 | 79.45 | 13.75 | 9.81  | 8.65  | 8.20 | 15.38 | 16.25 | 32.96 | 26.88 | 41.38 | 34.61 |
| 71  | LM71 x BW141  | 57.50 | 56.25 | 110.50 | 100.50 | 74.00 | 77.18 | 7.06  | 11.60 | 8.50  | 7.75 | 15.88 | 15.38 | 36.08 | 30.50 | 33.88 | 36.31 |
| 72  | BW141 x LM71  | 56.75 | 54.75 | 107.00 | 96.75  | 84.18 | 65.05 | 7.81  | 9.13  | 8.53  | 6.70 | 17.13 | 13.25 | 31.04 | 26.83 | 41.82 | 35.33 |
| 73  | LM70          | 64.00 | 62.25 | 105.00 | 95.50  | 91.08 | 84.98 | 11.06 | 9.81  | 10.25 | 9.74 | 18.75 | 18.38 | 44.21 | 36.25 | 43.99 | 32.07 |
| 74  | BW152 x BW140 | 58.75 | 54.75 | 112.00 | 98.00  | 86.08 | 74.33 | 9.25  | 9.81  | 8.68  | 7.60 | 19.63 | 15.83 | 46.38 | 20.39 | 38.87 | 28.88 |
| 75  | BW152 x BW162 | 63.33 | 64.00 | 105.25 | 96.75  | 80.85 | 73.40 | 6.63  | 8.00  | 7.98  | 7.95 | 16.38 | 17.38 | 38.17 | 28.13 | 38.56 | 32.80 |
| 76  | LM26 x BW152  | 60.00 | 62.33 | 107.00 | 101.00 | 91.10 | 80.73 | 12.31 | 8.75  | 9.87  | 8.73 | 20.00 | 17.25 | 48.54 | 30.29 | 37.27 | 37.82 |
| 77  | BW141 x LM48  | 55.00 | 61.00 | 104.00 | 104.33 | 84.13 | 72.60 | 15.69 | 7.50  | 8.08  | 7.53 | 15.88 | 14.88 | 41.50 | 32.44 | 39.37 | 44.97 |
| 78  | LM70 x LM48   | 70.00 | 66.00 | 112.50 | 112.00 | 93.90 | 91.30 | 8.25  | 4.25  | 10.60 | 9.30 | 20.00 | 18.00 | 53.67 | 23.67 | 37.50 | 50.00 |
| 79  | LM47 x BW141  | 56.00 | 56.00 | 102.75 | 99.25  | 98.75 | 79.88 | 11.13 | 8.94  | 8.51  | 8.81 | 16.38 | 18.13 | 37.00 | 27.75 | 43.16 | 33.01 |
| 80  | LM71 x LM47   | 61.50 | 63.25 | 103.25 | 96.25  | 88.93 | 83.43 | 10.50 | 7.46  | 10.93 | 9.35 | 18.63 | 16.50 | 45.88 | 33.75 | 43.48 | 36.21 |
| 81  | BW141 x LM47  | 58.25 | 61.25 | 108.00 | 97.00  | 98.40 | 71.38 | 11.44 | 4.63  | 9.73  | 8.03 | 18.38 | 14.38 | 33.00 | 28.63 | 43.22 | 37.56 |
| 82  | BW162 x LM70  | 64.67 | 61.50 | 104.00 | 96.75  | 72.35 | 82.08 | 8.00  | 9.81  | 8.56  | 9.58 | 15.38 | 17.00 | 25.00 | 31.79 | 50.00 | 38.58 |
| 83  | BW162 x LM47  | 64.50 | 60.50 | 107.00 | 96.25  | 84.50 | 81.45 | 12.94 | 9.25  | 7.63  | 8.03 | 14.63 | 15.25 | 35.42 | 28.17 | 39.60 | 34.66 |
| 84  | BW152 x LM71  | 59.50 | 61.75 | 103.25 | 96.50  | 83.95 | 83.50 | 5.19  | 9.88  | 7.98  | 9.24 | 15.00 | 17.13 | 31.58 | 34.71 | 45.34 | 30.91 |
| 85  | LM71 x BW162  | 63.00 | 61.00 | 105.00 | 97.00  | 88.75 | 78.70 | 14.06 | 9.56  | 9.20  | 9.40 | 18.13 | 16.25 | 35.75 | 29.75 | 39.93 | 32.92 |
| 86  | BW152 x LM47  | 63.75 | 64.75 | 106.50 | 95.75  | 89.73 | 77.03 | 8.50  | 8.06  | 9.20  | 7.75 | 18.50 | 15.88 | 41.38 | 29.79 | 39.60 | 32.47 |
| 87  | LM48 x LM71   | 64.25 | 61.00 | 109.25 | 98.00  | 89.50 | 79.65 | 10.81 | 10.81 | 10.29 | 8.60 | 19.38 | 16.50 | 56.13 | 33.67 | 37.01 | 28.32 |
| 88  | LM75 x LM26   | 56.25 | 58.25 | 105.25 | 99.75  | 89.48 | 74.53 | 10.81 | 7.88  | 9.41  | 7.83 | 18.88 | 16.25 | 42.08 | 29.13 | 43.44 | 28.29 |
| 89  | BW141 x BW162 | 56.75 | 56.25 | 102.50 | 98.25  | 85.73 | 69.03 | 9.38  | 12.31 | 9.75  | 7.85 | 18.38 | 15.00 | 40.63 | 26.83 | 43.12 | 31.56 |
| 90  | LM71          | 62.00 | 61.75 | 105.50 | 94.75  | 73.38 | 77.50 | 10.17 | 7.31  | 9.75  | 8.20 | 17.25 | 15.13 | 27.00 | 27.00 | 34.88 | 33.81 |

DTH = days to 50% heading, DTM = days to 50% maturity, PH = plant height (cm), TN = tiller number, SL = spike length (cm), SPS = spikelets per spike, KPS = kernels per spike, TKW = thousand kernel weight (g), NS = non-stressed, DS = drought-stressed

Table S1 continued.

| No. | Genotype      | DTH   |       | DTM    |        | PH    |       | TN    |       | SL   |      | SPS   |       | KPS   |       | TKW   |       |
|-----|---------------|-------|-------|--------|--------|-------|-------|-------|-------|------|------|-------|-------|-------|-------|-------|-------|
|     |               | NS    | DS    | NS     | DS     | NS    | DS    | NS    | DS    | NS   | DS   | NS    | DS    | NS    | DS    | NS    | DS    |
| 91  | LM48          | 63.00 | 62.00 | 104.00 | 96.00  | 82.40 | 67.25 | 7.88  | 7.13  | 8.00 | 7.60 | 15.25 | 13.88 | 38.63 | 30.00 | 31.09 | 26.75 |
| 92  | BW141 × BW140 | 53.00 | 55.50 | 102.00 | 100.50 | 77.60 | 66.63 | 7.34  | 7.25  | 7.95 | 7.38 | 16.38 | 14.50 | 30.63 | 22.46 | 42.24 | 37.88 |
| 93  | BW152 × LM70  | 60.50 | 61.25 | 99.50  | 94.00  | 94.23 | 85.00 | 10.25 | 12.06 | 9.99 | 9.25 | 18.13 | 17.13 | 40.46 | 25.21 | 43.14 | 30.54 |
| 94  | LM47 × BW162  | 62.50 | 64.50 | 103.75 | 98.25  | 87.35 | 83.18 | 9.88  | 9.00  | 8.50 | 8.81 | 16.38 | 17.63 | 37.21 | 28.38 | 43.33 | 32.95 |
| 95  | LM71 × LM48   | 58.25 | 64.50 | 105.75 | 97.75  | 92.48 | 87.98 | 13.56 | 9.00  | 9.89 | 9.50 | 19.13 | 18.13 | 39.79 | 38.29 | 37.62 | 29.97 |
| 96  | BW162 × LM71  | 61.50 | 59.00 | 102.75 | 98.50  | 90.45 | 68.78 | 14.19 | 6.69  | 9.90 | 7.25 | 18.38 | 13.25 | 38.25 | 25.42 | 47.92 | 38.09 |
| 97  | LM47 × LM71   | 63.25 | 63.00 | 103.75 | 94.75  | 93.55 | 76.50 | 9.38  | 7.63  | 9.50 | 8.10 | 18.38 | 14.63 | 37.42 | 29.75 | 42.37 | 27.64 |
| 98  | LM47          | 64.50 | 65.25 | 106.25 | 98.00  | 90.13 | 71.33 | 10.13 | 6.63  | 9.73 | 8.49 | 17.25 | 15.63 | 34.33 | 24.42 | 45.13 | 38.10 |
| 99  | LM75 × LM71   | 59.50 | 62.00 | 106.25 | 95.50  | 84.53 | 84.05 | 12.63 | 10.50 | 9.80 | 8.92 | 18.75 | 19.17 | 43.92 | 33.06 | 37.14 | 24.17 |
| 100 | BW152         | 61.50 | 63.00 | 103.00 | 96.25  | 88.65 | 60.45 | 14.68 | 7.19  | 9.20 | 6.95 | 16.38 | 15.38 | 31.46 | 26.04 | 42.78 | 33.62 |
|     | Mean          | 59.90 | 59.44 | 105.90 | 98.17  | 87.27 | 79.76 | 10.47 | 9.42  | 9.14 | 8.58 | 17.53 | 16.51 | 38.69 | 32.45 | 40.89 | 33.82 |
|     | LSD           | 4.14  | 4.56  | 6.13   | 5.63   | 13.64 | 13.49 | 4.99  | 5.85  | 1.22 | 1.78 | 2.34  | 3.46  | 12.25 | 11.27 | 7.00  | 6.94  |
|     | SEM           | 0.35  | 0.29  | 0.31   | 0.30   | 0.64  | 0.71  | 0.23  | 0.21  | 0.09 | 0.08 | 0.17  | 0.14  | 0.58  | 0.48  | 0.37  | 0.39  |
|     | CV            | 5.90  | 4.85  | 2.93   | 3.04   | 7.27  | 8.85  | 21.66 | 21.79 | 9.78 | 9.46 | 9.52  | 8.69  | 14.96 | 14.71 | 9.10  | 11.39 |

DTH = days to 50% heading, DTM = days to 50% maturity, PH = plant height (cm), TN = tiller number, SL = spike length (cm), SPS = spikelets per spike, KPS = kernels per spike, TKW = thousand kernel weight (g), LSD = least significant difference, SEM = standard error of mean, %CV = coefficient of variation, NS = non-stressed, DS = drought-stressed

Table S1 continued.

| No. | Genotype      | SB     |        | RB    |       | PB      |        | RS   |      | GY     |        |
|-----|---------------|--------|--------|-------|-------|---------|--------|------|------|--------|--------|
|     |               | NS     | DS     | NS    | DS    | NS      | DS     | NS   | DS   | NS     | DS     |
| 1   | LM75          | 239.58 | 297.30 | 49.96 | 70.25 | 682.40  | 680.32 | 0.29 | 0.26 | 335.78 | 267.32 |
| 2   | LM26 x BW140  | 233.25 | 199.69 | 27.20 | 54.92 | 572.95  | 536.96 | 0.17 | 0.29 | 267.10 | 241.33 |
| 3   | BW140 x LM71  | 170.75 | 177.42 | 13.00 | 32.88 | 443.28  | 458.36 | 0.07 | 0.18 | 221.82 | 215.63 |
| 4   | LM47 x BW152  | 191.85 | 301.13 | 13.29 | 53.94 | 417.31  | 594.91 | 0.06 | 0.18 | 209.51 | 204.99 |
| 5   | LM70 x BW152  | 308.13 | 201.93 | 15.19 | 40.57 | 733.45  | 479.53 | 0.06 | 0.25 | 350.53 | 202.60 |
| 6   | LM70 x BW141  | 158.63 | 188.03 | 27.72 | 30.77 | 584.77  | 448.72 | 0.41 | 0.15 | 340.52 | 196.52 |
| 7   | BW162 x LM75  | 289.19 | 252.30 | 37.16 | 64.09 | 764.35  | 537.48 | 0.10 | 0.25 | 436.16 | 188.96 |
| 8   | LM75 x BW141  | 231.36 | 212.91 | 33.32 | 28.82 | 669.32  | 457.69 | 0.15 | 0.12 | 345.85 | 184.58 |
| 9   | BW152 x BW141 | 147.57 | 265.18 | 28.12 | 65.07 | 514.11  | 542.62 | 0.19 | 0.33 | 255.81 | 181.52 |
| 10  | LM70 x BW162  | 214.65 | 173.67 | 26.08 | 53.36 | 468.07  | 438.48 | 0.21 | 0.38 | 223.02 | 180.73 |
| 11  | BW141 x LM26  | 338.36 | 174.62 | 42.10 | 28.91 | 657.34  | 289.35 | 0.14 | 0.22 | 313.93 | 178.91 |
| 12  | LM48 x BW140  | 369.12 | 155.91 | 48.37 | 32.60 | 962.54  | 396.74 | 0.11 | 0.21 | 465.86 | 177.98 |
| 13  | LM75 x LM47   | 228.06 | 288.63 | 28.09 | 37.59 | 612.34  | 519.75 | 0.13 | 0.15 | 304.43 | 177.73 |
| 14  | LM70 x LM26   | 197.57 | 242.52 | 15.81 | 54.35 | 441.47  | 515.55 | 0.08 | 0.28 | 194.95 | 172.00 |
| 15  | LM47 x BW140  | 211.62 | 216.17 | 24.29 | 54.99 | 582.29  | 486.55 | 0.12 | 0.26 | 296.05 | 171.01 |
| 16  | LM26 x LM71   | 306.70 | 231.70 | 41.22 | 45.08 | 640.76  | 476.35 | 0.14 | 0.21 | 290.47 | 170.58 |
| 17  | BW141 x LM75  | 304.99 | 207.99 | 19.75 | 49.06 | 607.51  | 455.56 | 0.08 | 0.23 | 285.74 | 169.67 |
| 18  | BW162 x LM26  | 240.26 | 243.97 | 38.05 | 54.59 | 544.58  | 427.52 | 0.16 | 0.22 | 227.57 | 166.10 |
| 19  | LM26 x BW141  | 217.49 | 147.15 | 37.95 | 21.70 | 662.21  | 362.72 | 0.21 | 0.15 | 347.67 | 165.70 |
| 20  | LM71 x LM26   | 388.93 | 199.61 | 41.80 | 50.42 | 1013.32 | 443.01 | 0.16 | 0.27 | 497.95 | 164.94 |
| 21  | BW152 x LM75  | 302.57 | 211.06 | 44.54 | 32.87 | 836.91  | 435.93 | 0.13 | 0.20 | 418.63 | 164.10 |
| 22  | LM48 x BW162  | 284.74 | 154.69 | 11.01 | 44.14 | 590.89  | 404.77 | 0.06 | 0.40 | 305.60 | 164.01 |
| 23  | LM75 x BW152  | 264.24 | 200.45 | 31.95 | 41.28 | 768.67  | 396.66 | 0.13 | 0.22 | 403.83 | 163.14 |
| 24  | BW152 x LM26  | 194.58 | 126.02 | 23.09 | 30.36 | 473.93  | 346.79 | 0.14 | 0.29 | 219.02 | 162.75 |
| 25  | BW140 x LM75  | 327.32 | 174.01 | 68.54 | 30.95 | 851.62  | 391.42 | 0.23 | 0.16 | 394.29 | 159.36 |
| 26  | BW140 x BW152 | 298.51 | 203.99 | 28.78 | 63.06 | 501.67  | 402.42 | 0.13 | 0.27 | 265.31 | 159.29 |
| 27  | BW162 x BW140 | 168.03 | 170.87 | 16.06 | 57.73 | 479.04  | 417.75 | 0.10 | 0.30 | 252.10 | 158.99 |
| 28  | LM75 x BW140  | 262.87 | 186.13 | 30.43 | 47.17 | 685.52  | 419.07 | 0.14 | 0.23 | 335.23 | 158.77 |
| 29  | LM71 x BW140  | 329.99 | 204.43 | 31.23 | 28.99 | 699.22  | 418.77 | 0.12 | 0.17 | 295.56 | 158.42 |
| 30  | BW141 x LM70  | 375.67 | 359.04 | 22.18 | 25.14 | 822.03  | 569.22 | 0.08 | 0.11 | 362.55 | 158.15 |

SB = shoot biomass (g m<sup>-2</sup>), RB = root biomass (g m<sup>-2</sup>), PB = total plant biomass (g m<sup>-2</sup>), RS = root to shoot ratio and GY = grain yield (g m<sup>-2</sup>), NS = non-stressed, DS = drought-stressed

Table S1 continued.

| No. | Genotype      | SB     |        | RB    |       | PB      |        | RS   |      | GY     |        |
|-----|---------------|--------|--------|-------|-------|---------|--------|------|------|--------|--------|
|     |               | NS     | DS     | NS    | DS    | NS      | DS     | NS   | DS   | NS     | DS     |
| 31  | LM75 x LM48   | 248.28 | 227.76 | 24.20 | 52.55 | 541.43  | 464.02 | 0.12 | 0.29 | 282.93 | 157.01 |
| 32  | BW141 x BW152 | 354.91 | 175.07 | 38.04 | 34.05 | 737.05  | 392.32 | 0.13 | 0.22 | 294.10 | 156.58 |
| 33  | LM75 x LM70   | 228.70 | 172.53 | 28.18 | 17.56 | 528.53  | 371.14 | 0.14 | 0.09 | 232.17 | 154.74 |
| 34  | LM70 x LM47   | 275.18 | 286.85 | 28.72 | 36.80 | 842.77  | 484.41 | 0.09 | 0.14 | 374.15 | 154.45 |
| 35  | LM26 x LM48   | 234.84 | 133.14 | 29.92 | 32.37 | 692.11  | 345.19 | 0.14 | 0.27 | 365.26 | 153.57 |
| 36  | BW162         | 307.79 | 124.96 | 26.75 | 28.12 | 771.99  | 331.71 | 0.12 | 0.28 | 373.88 | 152.67 |
| 37  | BW140 x LM70  | 228.48 | 143.97 | 28.62 | 47.66 | 540.94  | 369.63 | 0.13 | 0.65 | 242.60 | 152.14 |
| 38  | LM70 x LM75   | 371.09 | 265.52 | 47.30 | 29.55 | 947.47  | 472.59 | 0.13 | 0.10 | 452.21 | 151.73 |
| 39  | LM47 x LM70   | 181.44 | 246.43 | 24.38 | 38.46 | 412.26  | 461.89 | 0.14 | 0.16 | 176.44 | 151.28 |
| 40  | LM47 x LM48   | 248.33 | 251.02 | 25.92 | 27.09 | 586.48  | 480.80 | 0.12 | 0.12 | 266.87 | 151.00 |
| 41  | LM26 x BW162  | 264.61 | 272.42 | 34.58 | 50.50 | 737.26  | 498.24 | 0.14 | 0.19 | 374.41 | 149.85 |
| 42  | LM48 x LM26   | 223.14 | 231.05 | 26.10 | 49.37 | 673.73  | 454.77 | 0.12 | 0.22 | 362.82 | 149.02 |
| 43  | BW162 x LM48  | 270.60 | 218.48 | 34.92 | 56.46 | 647.42  | 446.25 | 0.13 | 0.29 | 292.22 | 146.42 |
| 44  | BW141         | 167.72 | 164.62 | 15.23 | 23.32 | 411.06  | 358.36 | 0.10 | 0.16 | 194.97 | 145.66 |
| 45  | LM75 x BW162  | 300.98 | 176.51 | 33.09 | 30.00 | 701.57  | 375.95 | 0.11 | 0.19 | 314.11 | 144.82 |
| 46  | BW140 x BW162 | 244.74 | 115.98 | 38.52 | 16.51 | 667.47  | 299.28 | 0.19 | 0.20 | 328.38 | 142.56 |
| 47  | LM71 x LM75   | 413.78 | 184.35 | 43.39 | 38.42 | 1019.04 | 389.43 | 0.16 | 0.27 | 480.24 | 142.45 |
| 48  | LM70 x BW140  | 156.74 | 149.50 | 45.10 | 17.02 | 435.10  | 332.62 | 0.66 | 0.13 | 197.30 | 141.96 |
| 49  | LM26 x LM75   | 350.90 | 211.09 | 40.12 | 53.31 | 954.03  | 429.96 | 0.15 | 0.28 | 481.21 | 141.50 |
| 50  | BW162 x BW141 | 266.05 | 180.52 | 75.71 | 43.27 | 776.54  | 386.17 | 0.26 | 0.23 | 371.60 | 138.78 |
| 51  | BW140 x LM48  | 112.54 | 125.04 | 7.14  | 23.04 | 278.22  | 308.84 | 0.07 | 0.22 | 151.68 | 137.40 |
| 52  | LM26          | 291.13 | 122.65 | 17.21 | 28.51 | 674.12  | 276.83 | 0.07 | 0.60 | 312.63 | 137.19 |
| 53  | LM48 x BW141  | 287.87 | 156.44 | 39.73 | 24.30 | 602.09  | 340.23 | 0.20 | 0.21 | 234.61 | 136.32 |
| 54  | LM47 x LM26   | 282.00 | 192.87 | 51.35 | 28.92 | 804.19  | 380.20 | 0.17 | 0.16 | 449.20 | 135.81 |
| 55  | BW140 x BW141 | 167.00 | 121.89 | 20.39 | 20.09 | 460.77  | 300.00 | 0.11 | 0.24 | 238.01 | 135.06 |
| 56  | BW152 x LM48  | 267.76 | 178.29 | 22.87 | 38.54 | 692.08  | 374.66 | 0.09 | 0.16 | 343.12 | 134.90 |
| 57  | BW140         | 281.02 | 169.50 | 27.62 | 42.47 | 656.31  | 365.69 | 0.09 | 0.27 | 353.33 | 131.38 |
| 58  | LM70 x LM71   | 186.01 | 289.16 | 22.67 | 64.86 | 522.58  | 507.64 | 0.18 | 0.24 | 266.99 | 131.30 |
| 59  | LM26 x LM47   | 322.08 | 166.32 | 37.34 | 36.65 | 768.22  | 356.54 | 0.12 | 0.28 | 349.40 | 131.25 |
| 60  | BW162 x BW152 | 242.65 | 244.84 | 53.62 | 32.65 | 644.57  | 455.70 | 0.23 | 0.21 | 297.69 | 130.49 |

SB = shoot biomass (g m<sup>-2</sup>), RB = root biomass (g m<sup>-2</sup>), PB = total plant biomass (g m<sup>-2</sup>), RS = root to shoot ratio and GY = grain yield (g m<sup>-2</sup>), NS = non-stressed, DS = drought-stressed

Table S1 continued.

| No. | Genotype      | SB     |        | RB    |       | PB     |        | RS   |      | GY     |        |
|-----|---------------|--------|--------|-------|-------|--------|--------|------|------|--------|--------|
|     |               | NS     | DS     | NS    | DS    | NS     | DS     | NS   | DS   | NS     | DS     |
| 61  | LM71 × BW152  | 225.04 | 163.97 | 21.24 | 34.45 | 604.82 | 359.81 | 0.12 | 0.22 | 227.61 | 130.41 |
| 62  | LM48 × LM47   | 299.65 | 120.72 | 26.80 | 30.80 | 552.61 | 303.67 | 0.10 | 0.34 | 235.58 | 130.04 |
| 63  | BW140 × LM26  | 283.59 | 150.38 | 31.09 | 24.11 | 670.11 | 325.65 | 0.11 | 0.19 | 303.78 | 129.20 |
| 64  | LM47 × LM75   | 254.44 | 212.38 | 33.94 | 31.35 | 634.92 | 393.28 | 0.13 | 0.16 | 296.19 | 127.82 |
| 65  | LM26 × LM70   | 369.95 | 197.27 | 31.99 | 17.41 | 625.15 | 395.97 | 0.08 | 0.20 | 258.98 | 127.72 |
| 66  | LM71 × LM70   | 138.22 | 146.78 | 18.28 | 41.87 | 411.76 | 337.39 | 0.15 | 0.26 | 233.06 | 127.13 |
| 67  | LM48 × LM75   | 275.22 | 123.82 | 25.69 | 21.65 | 765.71 | 237.56 | 0.14 | 0.24 | 397.27 | 125.23 |
| 68  | LM48 × LM70   | 337.22 | 181.24 | 18.41 | 59.07 | 800.17 | 385.80 | 0.08 | 0.30 | 379.95 | 124.35 |
| 69  | LM48 × BW152  | 174.58 | 200.71 | 50.77 | 28.29 | 546.33 | 346.80 | 0.25 | 0.23 | 274.34 | 124.07 |
| 70  | BW140 × LM47  | 184.46 | 230.98 | 46.98 | 69.38 | 556.07 | 444.20 | 0.46 | 0.29 | 277.45 | 122.94 |
| 71  | LM71 × BW141  | 162.61 | 160.60 | 23.11 | 45.84 | 478.25 | 349.70 | 0.27 | 0.26 | 250.02 | 122.44 |
| 72  | BW141 × LM71  | 173.86 | 96.06  | 20.55 | 18.39 | 427.39 | 231.54 | 0.13 | 0.14 | 199.13 | 119.20 |
| 73  | LM70          | 365.06 | 245.33 | 19.11 | 42.40 | 847.96 | 426.63 | 0.07 | 0.17 | 396.39 | 118.71 |
| 74  | BW152 × BW140 | 288.63 | 160.45 | 23.31 | 53.34 | 730.11 | 393.69 | 0.08 | 0.31 | 357.41 | 118.60 |
| 75  | BW152 × BW162 | 170.07 | 131.74 | 18.00 | 17.57 | 450.42 | 272.57 | 0.10 | 0.22 | 224.23 | 117.65 |
| 76  | LM26 × BW152  | 348.96 | 157.93 | 44.96 | 27.50 | 910.06 | 322.86 | 0.21 | 0.17 | 441.14 | 117.46 |
| 77  | BW141 × LM48  | 229.43 | 119.85 | 23.30 | 18.31 | 683.91 | 280.77 | 0.11 | 0.25 | 356.58 | 117.25 |
| 78  | LM70 × LM48   | 180.83 | 128.33 | 10.03 | 12.15 | 516.84 | 287.19 | 0.10 | 0.17 | 271.77 | 116.67 |
| 79  | LM47 × BW141  | 253.48 | 179.62 | 31.28 | 73.29 | 595.31 | 387.78 | 0.12 | 0.44 | 265.43 | 115.28 |
| 80  | LM71 × LM47   | 244.24 | 167.27 | 26.54 | 28.76 | 545.48 | 284.85 | 0.13 | 0.37 | 276.88 | 115.09 |
| 81  | BW141 × LM47  | 236.86 | 104.70 | 32.00 | 25.11 | 598.02 | 262.04 | 0.18 | 0.41 | 281.34 | 113.02 |
| 82  | BW162 × LM70  | 102.23 | 98.74  | 13.59 | 39.68 | 270.87 | 265.10 | 0.13 | 0.42 | 176.69 | 112.73 |
| 83  | BW162 × LM47  | 226.81 | 205.60 | 33.90 | 39.29 | 595.36 | 374.49 | 0.21 | 0.19 | 292.67 | 110.77 |
| 84  | BW152 × LM71  | 151.59 | 189.16 | 42.60 | 44.03 | 562.41 | 357.08 | 0.24 | 0.20 | 226.02 | 105.89 |
| 85  | LM71 × BW162  | 374.76 | 162.53 | 31.60 | 30.87 | 830.54 | 296.63 | 0.09 | 0.30 | 362.54 | 104.44 |
| 86  | BW152 × LM47  | 269.27 | 148.63 | 23.75 | 36.37 | 585.16 | 306.76 | 0.09 | 0.25 | 249.69 | 104.06 |
| 87  | LM48 × LM71   | 326.32 | 221.77 | 36.43 | 82.97 | 897.12 | 424.90 | 0.19 | 0.38 | 456.72 | 102.69 |
| 88  | LM75 × LM26   | 274.35 | 102.73 | 26.17 | 30.51 | 764.08 | 252.22 | 0.10 | 0.33 | 396.20 | 101.69 |
| 89  | BW141 × BW162 | 186.70 | 153.22 | 25.53 | 33.58 | 525.70 | 304.95 | 0.17 | 0.24 | 267.93 | 100.99 |
| 90  | LM71          | 216.93 | 130.79 | 36.02 | 28.57 | 593.20 | 277.39 | 0.14 | 0.20 | 241.39 | 100.87 |

SB = shoot biomass (g m<sup>-2</sup>), RB = root biomass (g m<sup>-2</sup>), PB = total plant biomass (g m<sup>-2</sup>), RS = root to shoot ratio and GY = grain yield (g m<sup>-2</sup>), NS = non-stressed, DS = drought-stressed

Table S1 continued.

| No. | Genotype      | SB     |        | RB    |       | PB     |        | RS    |       | GY     |        |
|-----|---------------|--------|--------|-------|-------|--------|--------|-------|-------|--------|--------|
|     |               | NS     | DS     | NS    | DS    | NS     | DS     | NS    | DS    | NS     | DS     |
| 91  | LM48          | 153.67 | 106.63 | 13.73 | 21.78 | 434.85 | 208.83 | 0.10  | 0.41  | 228.59 | 100.27 |
| 92  | BW141 x BW140 | 165.03 | 125.72 | 24.59 | 27.37 | 462.64 | 270.09 | 0.15  | 0.34  | 233.34 | 100.01 |
| 93  | BW152 x LM70  | 267.00 | 272.00 | 54.38 | 28.83 | 672.66 | 360.14 | 0.19  | 0.11  | 300.24 | 99.55  |
| 94  | LM47 x BW162  | 204.81 | 176.25 | 41.11 | 36.82 | 510.12 | 329.31 | 0.23  | 0.21  | 225.81 | 99.36  |
| 95  | LM71 x LM48   | 321.24 | 196.36 | 58.69 | 40.68 | 824.41 | 353.02 | 0.18  | 0.32  | 379.90 | 99.13  |
| 96  | BW162 x LM71  | 334.12 | 103.75 | 25.92 | 14.65 | 809.10 | 225.54 | 0.09  | 0.18  | 432.71 | 91.57  |
| 97  | LM47 x LM71   | 277.87 | 196.21 | 27.94 | 31.15 | 715.38 | 283.55 | 0.12  | 0.20  | 350.05 | 89.96  |
| 98  | LM47          | 271.05 | 151.17 | 22.85 | 32.64 | 657.22 | 287.85 | 0.08  | 0.20  | 310.53 | 88.92  |
| 99  | LM75 x LM71   | 323.36 | 347.87 | 46.38 | 73.42 | 763.69 | 505.65 | 0.15  | 0.21  | 336.71 | 72.11  |
| 100 | BW152         | 399.15 | 121.55 | 31.00 | 23.24 | 922.43 | 199.76 | 0.09  | 0.32  | 420.74 | 67.00  |
|     | <b>Mean</b>   | 256.20 | 186.60 | 30.99 | 38.06 | 643.60 | 384.80 | 0.15  | 0.24  | 310.10 | 141.20 |
|     | <b>LSD</b>    | 141.90 | 142.30 | 31.26 | 33.76 | 342.70 | 250.60 | 0.23  | 0.23  | 183.10 | 95.90  |
|     | <b>SEM</b>    | 6.97   | 5.52   | 1.24  | 1.51  | 15.71  | 9.04   | 0.01  | 0.01  | 7.87   | 3.37   |
|     | <b>CV</b>     | 27.21  | 29.59  | 40.07 | 39.55 | 24.41  | 23.50  | 56.06 | 38.27 | 25.37  | 23.87  |

SB = shoot biomass (g m<sup>-2</sup>), RB = root biomass (g m<sup>-2</sup>), PB = total plant biomass (g m<sup>-2</sup>), RS = root to shoot ratio and GY = grain yield (g m<sup>-2</sup>), LSD = least significant difference, SEM = standard error of mean, %CV = coefficient of variation, NS = non-stressed, DS = drought-stressed



**Table S2.** Direct (bold face values) and indirect effects for yield components and root attributes on grain yield of 10 bread wheat parental lines and 90 F<sub>2</sub> progenies under drought-stressed conditions at two sites.

| Traits | DTH          | DTM         | PH          | TN          | SL          | SPS          | KPS         | TKW         | SB           | RB           | PB          | RS          | GY       |
|--------|--------------|-------------|-------------|-------------|-------------|--------------|-------------|-------------|--------------|--------------|-------------|-------------|----------|
| DTH    | <b>-0.19</b> | 0.06        | -0.05       | 0.01        | -0.05       | -0.02        | 0.01        | 0.03        | -0.03        | -0.01        | 0.01        | -0.01       | -0.38*** |
| DTM    | -0.02        | <b>0.06</b> | -0.02       | -0.01       | -0.02       | -0.01        | 0.00        | 0.02        | -0.01        | 0.00         | 0.00        | 0.01        | 0.24*    |
| PH     | 0.01         | -0.01       | <b>0.03</b> | 0.01        | 0.03        | 0.02         | 0.01        | -0.01       | 0.02         | 0.01         | 0.02        | -0.01       | 0.26**   |
| TN     | 0.00         | 0.00        | 0.01        | <b>0.03</b> | 0.01        | 0.01         | 0.01        | -0.01       | 0.02         | 0.02         | 0.02        | 0.00        | 0.34***  |
| SL     | 0.00         | 0.00        | 0.00        | 0.00        | <b>0.00</b> | 0.00         | 0.00        | 0.00        | 0.00         | 0.00         | 0.00        | 0.00        | 0.24*    |
| SPS    | -0.02        | 0.02        | -0.08       | -0.04       | -0.10       | <b>-0.13</b> | -0.07       | 0.05        | -0.07        | -0.05        | -0.07       | 0.02        | 0.26*    |
| KPS    | -0.01        | -0.02       | 0.13        | 0.08        | 0.17        | 0.18         | <b>0.34</b> | -0.10       | 0.14         | 0.08         | 0.17        | -0.04       | 0.55***  |
| TKW    | -0.02        | 0.06        | -0.03       | -0.04       | -0.04       | -0.06        | -0.05       | <b>0.16</b> | -0.07        | -0.06        | -0.04       | -0.01       | 0.09     |
| SB     | -0.06        | 0.09        | -0.29       | -0.22       | -0.26       | -0.24        | -0.17       | 0.16        | <b>-0.41</b> | -0.24        | -0.36       | 0.13        | 0.39***  |
| RB     | -0.01        | 0.01        | -0.06       | -0.08       | -0.06       | -0.06        | -0.04       | 0.05        | -0.09        | <b>-0.15</b> | -0.10       | -0.06       | 0.28**   |
| PB     | -0.06        | -0.03       | 0.60        | 0.57        | 0.54        | 0.55         | 0.50        | -0.26       | 0.88         | 0.65         | <b>1.00</b> | -0.19       | 0.68***  |
| RS     | 0.00         | 0.00        | -0.01       | 0.00        | 0.00        | 0.00         | 0.00        | 0.00        | -0.01        | 0.01         | -0.01       | <b>0.03</b> | -0.14    |

\* significant at P < 0.05; \*\* P< 0.01, DTH = days to 50% heading, DTM = days to 50% maturity, PH = plant height (cm), TN = tiller number, SL = spike length (cm), SPS = spikelets per spike, KPS = kernels per spike, TKW = thousand kernel weight (g), SB = shoot biomass (g m<sup>-2</sup>), RB = root biomass (g m<sup>-2</sup>), PB = total plant biomass (g m<sup>-2</sup>), RS = root to shoot ratio and GY = grain yield (g m<sup>-2</sup>).

**Table S3.** Direct (bold face values) and indirect effects for yield components and root attributes on grain yield of 10 bread wheat parental lines and 90 F<sub>2</sub> progenies under non-stressed conditions at two sites.

| Traits | DTH          | DTM         | PH          | TN          | SL           | SPS         | KPS         | TKW         | SB           | RB           | PB          | RS          | GY      |
|--------|--------------|-------------|-------------|-------------|--------------|-------------|-------------|-------------|--------------|--------------|-------------|-------------|---------|
| DTH    | <b>-0.02</b> | 0.00        | -0.01       | 0.00        | 0.00         | 0.00        | 0.00        | 0.00        | 0.00         | 0.00         | 0.00        | 0.00        | 0.02    |
| DTM    | 0.00         | <b>0.03</b> | 0.00        | 0.00        | 0.00         | 0.01        | 0.00        | -0.01       | 0.00         | 0.00         | 0.00        | 0.00        | 0.02    |
| PH     | 0.00         | 0.00        | <b>0.00</b> | 0.00        | 0.00         | 0.00        | 0.00        | 0.00        | 0.00         | 0.00         | 0.00        | 0.00        | 0.48*** |
| TN     | 0.00         | 0.00        | 0.03        | <b>0.08</b> | 0.02         | 0.02        | 0.01        | 0.00        | 0.05         | 0.03         | 0.05        | 0.00        | 0.60*** |
| SL     | 0.00         | 0.00        | 0.00        | 0.00        | <b>-0.01</b> | -0.01       | 0.00        | 0.00        | 0.00         | 0.00         | 0.00        | 0.00        | 0.41*** |
| SPS    | 0.00         | 0.00        | 0.01        | 0.00        | 0.01         | <b>0.01</b> | 0.01        | 0.00        | 0.01         | 0.00         | 0.01        | 0.00        | 0.48*** |
| KPS    | 0.02         | 0.01        | 0.04        | 0.02        | 0.06         | 0.08        | <b>0.13</b> | -0.03       | 0.04         | 0.01         | 0.05        | -0.02       | 0.48*** |
| TKW    | 0.00         | -0.02       | 0.02        | 0.00        | 0.01         | 0.00        | -0.02       | <b>0.08</b> | 0.00         | 0.01         | 0.01        | 0.01        | 0.13    |
| SB     | -0.02        | -0.02       | -0.10       | -0.11       | -0.09        | -0.09       | -0.06       | -0.01       | <b>-0.19</b> | -0.07        | -0.16       | 0.05        | 0.73*** |
| RB     | 0.02         | 0.00        | -0.04       | -0.06       | -0.03        | -0.03       | -0.01       | -0.01       | -0.05        | <b>-0.13</b> | -0.07       | -0.09       | 0.41*** |
| PB     | 0.04         | 0.03        | 0.55        | 0.66        | 0.44         | 0.50        | 0.43        | 0.11        | 0.89         | 0.52         | <b>1.06</b> | -0.05       | 0.94*** |
| RS     | -0.01        | 0.00        | 0.00        | 0.00        | 0.00         | -0.01       | -0.01       | 0.01        | -0.02        | 0.04         | 0.00        | <b>0.07</b> | -0.03   |

\* significant at P < 0.05; \*\* P< 0.01, DTH = days to 50% heading, DTM = days to 50% maturity, PH = plant height (cm), TN = tiller number, SL = spike length (cm), SPS = spikelets per spike, KPS = kernels per spike, TKW = thousand kernel weight (g), SB = shoot biomass (g m<sup>-2</sup>), RB = root biomass (g m<sup>-2</sup>), PB = total plant biomass (g m<sup>-2</sup>), RS = root to shoot ratio and GY = grain yield (g m<sup>-2</sup>).
